# Supplementary material for: A general transition metal binding aptamer following the Irving–Williams series
Source: Royal Society of Chemistry journal article supplement (doi:10.1039/d5sc02436f), 2025-01-01
Supplement: d5sc02436f1.xlsx [file d5sc02436f1.xlsx]

## Sheet: Figure 2A
Wavelength (nm)	0 nM	50 nM	100 nM	250 nM	500 nM	750 nM	1000 nM	2000 nM	5000 nM	10000 nM
461.94	131.911	124.941	119.75	106.661	91.5673	77.3675	68.5165	52.0685	45.7523	38.1045
462.98	143.12	135.438	130.221	116.554	99.5747	84.9086	74.6836	57.648	49.9202	42.2303
464.02	153.886	145.547	140.27	126.043	107.294	92.1472	80.6666	63.0222	53.978	46.1953
465.07	164.211	155.271	149.895	135.129	114.727	99.0832	86.4656	68.1911	57.9255	49.9995
465.97	174.093	164.607	159.097	143.811	121.871	105.717	92.0806	73.1546	61.7628	53.6429
467.01	183.533	173.558	167.876	152.09	128.728	112.047	97.5115	77.9129	65.4899	57.1255
468.05	192.531	182.122	176.231	159.965	135.297	118.076	102.759	82.4658	69.1067	60.4473
468.95	201.087	190.299	184.162	167.437	141.579	123.801	107.821	86.8135	72.6134	63.6083
470	209.201	198.09	191.671	174.504	147.572	129.224	112.7	90.9558	76.0098	66.6084
471.04	216.873	205.495	198.756	181.169	153.279	134.345	117.395	94.8928	79.296	69.4478
471.94	224.102	212.513	205.418	187.429	158.697	139.163	121.906	98.6246	82.472	72.1264
472.98	231.176	219.428	211.935	193.291	164.046	143.775	126.658	102.254	85.806	74.9084
474.02	237.782	226.062	218.337	198.947	169.116	148.132	131.159	105.609	88.9811	77.3281
475.07	244.452	232.218	224.211	204.279	173.619	152.385	135.415	108.919	92.2734	79.6382
475.97	250.638	238.07	229.786	209.001	177.842	156.085	139.5	112.043	95.0796	81.6884
477.01	255.73	243.18	234.333	212.729	181.821	159.2	143.122	114.806	97.5516	83.4313
478.05	259.988	247.523	238.136	216.436	185.211	161.714	145.994	117.01	99.8902	85.0524
478.95	263.763	251.021	241.371	220.046	188.105	164.191	148.335	119.091	102.007	86.5196
480	266.577	253.919	243.964	223.056	190.529	166.401	150.474	121.202	103.755	87.7242
481.06	267.869	256.031	245.946	225.492	192.821	167.959	152.131	122.911	104.96	88.6543
481.96	268.786	257.595	247.637	227.392	194.399	169.167	153.069	123.967	106.036	89.5593
483.03	269.361	258.074	248.757	228.628	195.575	170.568	153.47	124.825	106.633	90.3959
483.93	269.53	257.676	249.125	229.098	196.33	171.669	153.593	125.601	106.965	90.9233
485	268.953	256.899	249.209	228.8	196.617	172.079	153.733	126.137	106.98	91.2822
486.06	268.311	256.033	248.976	227.861	196.405	172.327	153.655	126.313	106.968	91.3747
486.96	267.479	254.805	248.109	226.784	195.515	172.295	153.053	126.246	106.853	91.374
488.03	265.859	252.938	246.534	225.517	194.347	171.723	152.139	125.936	106.653	91.1863
488.93	263.732	250.675	244.63	223.927	192.923	170.821	151.31	125.452	106.007	91.1796
490	261.099	248.281	242.473	222.053	191.491	169.911	150.264	124.581	104.919	91.2675
491.04	258.449	245.833	239.632	220.492	189.717	168.653	149.051	123.476	103.766	91.006
491.94	255.335	242.937	236.375	218.482	187.671	167.198	147.543	122.294	102.832	90.0793
492.98	252.271	239.992	232.977	215.872	185.66	165.756	146.236	121.19	101.91	88.7179
494.02	249.488	237.071	229.808	213.356	183.452	164.095	144.776	120.04	100.604	87.4922
495.07	246.79	234.059	226.34	210.72	180.998	161.945	143.334	118.704	99.1897	86.4029
495.97	243.424	230.749	223.046	207.912	178.363	159.359	141.517	117.045	97.5076	85.2428
497.01	239.77	227.316	219.453	204.755	175.506	156.637	139.494	115.219	95.7848	83.8126
498.05	236.49	223.569	216.047	201.988	172.317	154.077	137.515	113.483	94.1251	82.384
498.95	232.77	219.465	212.625	199.045	169.373	151.73	135.692	111.83	92.4613	80.8976
500	228.594	215.706	209.207	195.702	166.732	149.144	133.677	110.096	90.5263	79.3392
501.02	224.531	211.864	205.664	192.09	163.771	146.666	131.337	107.949	88.3644	77.713
502.05	221.248	207.741	202.235	188.617	160.538	144.388	128.961	105.64	86.3849	76.0933
502.94	217.703	203.225	198.715	185.012	157.423	142.127	126.764	103.667	84.4444	74.4363
503.97	214.137	199.565	195.395	181.123	154.756	139.48	124.748	101.995	82.8157	72.725
505	210.372	196.302	192.223	177.242	151.893	136.994	122.801	100.144	81.484	71.3286
506.02	206.607	192.665	188.874	173.407	148.969	134.69	120.699	98.1338	80.5105	69.9478
507.05	202.554	188.6	185.088	169.723	146.075	132.389	118.611	96.4104	79.6318	68.7084
507.94	198.589	184.826	181.336	166.226	143.697	130.067	116.624	94.8598	78.7864	67.6002
508.97	194.631	181.167	177.617	162.808	140.972	127.686	114.516	93.1773	77.7716	66.5969
510	190.626	177.535	173.86	159.457	138.269	125.304	112.391	91.5366	76.8378	65.6912
511.04	186.573	173.93	170.065	156.173	135.589	122.922	110.252	89.938	75.9853	64.883
511.94	182.473	170.351	166.234	152.956	132.931	120.539	108.098	88.3812	75.2139	64.1723
512.98	178.325	166.8	162.365	149.806	130.295	118.156	105.928	86.8664	74.5236	63.5592
514.02	174.13	163.275	158.458	146.723	127.681	115.772	103.742	85.3935	73.9145	63.0436
515.07	169.887	159.778	154.514	143.707	125.09	113.388	101.542	83.9625	73.3866	62.6255
515.97	165.597	156.307	150.533	140.757	122.521	111.003	99.3264	82.5735	72.9398	62.305
517.01	161.259	152.863	146.515	137.875	119.974	108.618	97.0954	81.2263	72.5742	62.082
518.05	156.874	149.446	142.459	135.059	117.449	106.232	94.8492	79.9211	72.2897	61.9565

## Sheet: Figure 2B
	Co-1		Co-1a
Concentration of Co2+ (nM)	F/F0	Stdev	F/F0	Stdev
0	1	0	1	0
50	0.960744	0.0245076	1.01029	0.024898
100	0.905322	0.0184999	1.05725	0.0630678
250	0.83593	0.0232653	1.02426	0.000395215
500	0.732985	0.0080649	1.06008	0.0114253
750	0.645615	0.00103318	1.0822	0.000354159
1000	0.593122	0.0308724	1.07276	0.00259871
2000	0.468536	0.00786816	1.03294	0.0397918
5000	0.40241	0.0100834	0.984283	0.0517076
10000	0.353862	0.00618327	0.927849	0.0143822

## Sheet: Figure 2C
Wavelength (nm)	0 nM	50 nM	100 nM	250 nM	500 nM	750 nM	1000 nM	2000 nM
461.94	122.157	109.173	100.894	82.221	62.8376	50.6004	44.6926	37.9479
462.98	131.837	118.298	110.218	89.971	68.8114	55.6639	49.1065	41.8644
464.02	141.148	127.072	119.133	97.38	74.5678	60.5517	53.3637	45.6605
465.07	150.093	135.496	127.637	104.448	80.1068	65.2637	57.4643	49.3363
465.97	158.669	143.569	135.732	111.175	85.4283	69.7999	61.4081	52.8918
467.01	166.879	151.292	143.417	117.561	90.5324	74.1604	65.1953	56.327
468.05	174.721	158.664	150.692	123.606	95.4191	78.3451	68.8259	59.6419
468.95	182.196	165.685	157.557	129.31	100.088	82.3541	72.2997	62.8365
470	189.303	172.356	164.013	134.673	104.54	86.1873	75.6169	65.9109
471.04	196.043	178.677	170.059	139.695	108.775	89.8447	78.7774	68.8649
471.94	202.416	184.647	175.695	144.377	112.792	93.3264	81.7812	71.6986
472.98	208.735	190.92	180.915	148.483	117.08	97.0576	84.6883	74.6015
474.02	214.535	196.636	185.911	152.255	121.031	100.441	87.5025	77.2293
475.07	219.98	201.492	190.451	155.955	124.474	103.503	90.2165	79.7489
475.97	225.031	205.56	194.44	159.588	127.278	106.026	92.7713	82.1149
477.01	229.563	209.17	197.962	163.046	130.025	108.326	94.9576	84.3821
478.05	233.752	212.715	201.153	166.119	132.507	110.679	96.84	86.5647
478.95	237.53	216.229	203.933	168.798	134.553	112.81	98.5534	88.5983
480	240.545	219.228	206.196	170.973	136.14	114.348	100.261	90.1591
481.06	242.984	221.104	207.871	172.59	137.415	115.557	101.617	91.2761
481.96	244.922	222.589	209.055	174.144	138.425	116.725	102.637	92.0131
483.03	246.36	223.679	210.086	175.603	138.909	117.67	103.29	92.4967
483.93	247.058	224.187	210.764	176.549	138.935	118.1	103.861	92.5632
485	247.282	224.423	211.53	176.626	138.808	118.17	104.265	92.576
486.06	246.562	224.444	212.07	176.693	138.756	117.746	104.463	92.5672
486.96	245.444	223.823	212.086	176.641	139.034	117.188	104.4	92.5165
488.03	243.762	222.611	211.031	176.304	139.24	116.51	104.102	92.1216
488.93	241.798	221.481	209.772	175.732	139.077	115.899	103.437	91.424
490	239.351	220.222	208.22	174.878	138.245	115.15	102.378	90.5438
491.04	236.747	218.378	206.15	173.538	137.13	114.502	101.401	89.7617
491.94	233.278	216.513	203.381	171.652	135.798	113.522	100.319	88.9914
492.98	229.15	214.152	200.787	169.656	134.46	112.054	99.0131	88.0228
494.02	225.063	211.141	198.195	167.521	132.709	110.351	97.7708	86.9195
495.07	221.435	207.352	195.454	165.379	130.751	108.773	96.6192	85.8448
495.97	218.049	203.497	192.859	162.796	128.595	107.303	95.0885	84.7709
497.01	214.664	199.461	190.389	160.091	126.706	106.105	93.5508	83.6228
498.05	211.492	195.95	187.867	157.564	124.53	104.864	92.3114	82.3577
498.95	208.177	192.655	185.119	155.058	122.215	103.343	91.2505	81.2048
500	204.624	189.219	181.963	152.066	119.867	101.438	89.9621	80.071
501.02	200.865	185.191	178.265	149.108	117.592	99.7462	88.5608	78.9399
502.05	197.16	181.61	174.533	146.411	115.087	98.2576	87.0239	77.5075
502.94	193.455	178.388	171.291	143.585	112.661	96.8309	85.5666	76.1287
503.97	189.851	175.298	168.265	140.722	110.68	95.0895	84.3526	74.7529
505	186.484	172.308	165.465	138.057	108.853	93.2451	83.1751	73.61
506.02	183.179	169.174	162.445	135.582	106.981	91.5557	81.8698	72.3957
507.05	180.228	165.972	159.146	132.887	105.197	90.2888	80.56	71.0573
507.94	176.912	162.796	155.79	130.392	103.659	88.8598	79.2659	69.6864
508.97	173.397	159.661	152.712	127.847	101.916	87.3465	78.0284	68.5627
510	169.833	156.584	149.656	125.331	100.19	85.8351	76.8011	67.4805
511.04	166.218	153.566	146.624	122.842	98.4798	84.3254	75.5841	66.4397
511.94	162.555	150.606	143.614	120.382	96.7867	82.8175	74.3774	65.4404
512.98	158.841	147.704	140.626	117.95	95.1102	81.3113	73.1809	64.4826
514.02	155.078	144.86	137.662	115.547	93.4503	79.807	71.9946	63.5662
515.07	151.265	142.074	134.72	113.171	91.807	78.3044	70.8186	62.6912
515.97	147.402	139.347	131.802	110.824	90.1804	76.8036	69.6529	61.8577
517.01	143.489	136.677	128.906	108.505	88.5704	75.3045	68.4974	61.0657
518.05	139.527	134.066	126.032	106.214	86.977	73.8073	67.3521	60.3151

## Sheet: Figure 2D
	Co-1		Co-1a
Concentration of Ni2+ (nM)	F/F0	Stdev	F/F0	Stdev
0	1	0	1	0
50	0.936194	0.0247045	1.00772	0.000603233
100	0.8862	0.0185264	1.04523	0.00350298
250	0.761073	0.024966	1.07597	0.0016522
500	0.58737	0.00668018	1.09245	0.0290958
750	0.494004	0.00303753	1.10389	0.00474997
1000	0.442909	0.0128936	1.07506	0.00310853
2000	0.386142	0.00282543	1.07507	0.00436554

## Sheet: Figure 3B
Time (min)	F (a.u)
	0 nM	100 nM	200 nM	500 nM	750 nM	1000 nM	2000 nM	5000 nM	100000 nM
0	1150	1131	1143	1163	1145	1171	1178	1130	1168
0.5	1150	1155	1068	1187	1153	1159	1152	1145	1175
1	1149	1165	1071	1178	1157	1149	1131	1122	1215
1.5	1142	1160	1056	1180	1135	1148	1066	1114	1189
2	1139	1146	1040	1171	1119	1149	1062	1107	1167
2.5	1140	1144	1025	1174	1102	1157	1058	1108	1166
3	1137	1145	1019	1168	1092	1153	1050	1098	1159
3.5	1134	1145	1016	1170	1082	1154	1047	1103	1153
4	1132	1136	1010	1167	1075	1151	1049	1099	1145
4.5	1124	1135	1005	1164	1068	1146	1047	1103	1140
5	1126	1130	1010	1159	1056	1144	1047	1095	1134
5.5	1166	1163	1243	1678	1641	1915	2379	3798	5230
6	1176	1157	1257	1751	1745	2083	2698	4519	5974
6.5	1176	1164	1286	1837	1850	2251	3021	5047	6397
7	1177	1165	1319	1925	1953	2415	3287	5446	6608
7.5	1178	1168	1337	1998	2048	2573	3551	5735	6710
8	1178	1169	1352	2062	2138	2721	3750	5915	6762
8.5	1178	1172	1374	2129	2233	2855	3954	6075	6781
9	1174	1165	1397	2179	2304	2972	4104	6177	6811
9.5	1174	1161	1402	2236	2365	3090	4266	6277	6830
10	1172	1165	1417	2285	2441	3201	4413	6333	6850
10.5	1175	1167	1425	2334	2512	3303	4513	6395	6865
11	1168	1163	1439	2381	2562	3387	4641	6407	6853
11.5	1165	1163	1450	2418	2615	3469	4726	6438	6856
12	1164	1163	1457	2453	2667	3549	4803	6455	6853
12.5	1158	1157	1467	2500	2716	3627	4882	6462	6852
13	1156	1155	1474	2521	2756	3683	4954	6447	6816
13.5	1155	1156	1480	2555	2806	3750	5013	6456	6849
14	1153	1154	1480	2574	2837	3813	5072	6457	6826
14.5	1148	1151	1486	2614	2871	3847	5104	6459	6818
15	1143	1150	1490	2637	2902	3896	5141	6471	6819

## Sheet: Figure 3C
Concentration of Co2+ (nM)	(F-F0)/F0	Stdev
0	0.00547416	0.0136097
100	0.0280803	0.0146812
200	0.454047	0.030271
500	1.30221	0.0381412
750	1.73586	0.0157367
1000	2.39177	0.0195503
2000	3.94338	0.0489345
5000	4.62294	0.401795
10000	4.86286	0.215494

## Sheet: Figure 3D
	0.1 µM		1 µM		10 µM		100 µM
	(F-F0)/F0	Stdev			(F-F0)/F0	Stdev	(F-F0)/F0	Stdev
Ca2+					-0.03008	0.03769	-0.05096	0.05901
Sc3+					-0.76346	0.01643	-0.62014	0.05454
Cr3+					-0.04853	0.06352	-0.5834	0.03582
Mn2+					0.15312	0.02088	2.26919	0.3617
Fe2+					3.40307	0.10923
Co2+			2.39177	0.01955
Ni2+			2.75682	0.36994
Cu2+	2.25028	0.18455
Zn2+					3.69064	0.33795
Sr2+					-0.01453	0.02671	-0.03145	0.03328
Y3+					-0.1053	0.00207	-0.06127	0.03109
Cd2+					3.49214	0.06857
Ba2+					-0.0046	0.02599	-0.05595	0.02732
Hg2+					-0.16348	0.00763	-0.34975	0.00444
Pb2+					0.04654	0.01753	0.23511	0.00784

## Sheet: Figure 6 ITC
Thermogram			Intergrated heat
Time (s)	μcal/sec		Molar Ratio	kcal per mole of injection	Fitted
2	-0.00141		0.0406		-14.9037
3	-0.00154		0.20399		-14.6721
4	0.000764539		0.36895	-13.7709	-14.2117
5	0.00113		0.5355	-13.4451	-13.5967
6	-0.000705067		0.70363	-12.8874	-12.7787
7	-0.00137		0.87334	-12.1098	-11.7124
8	-0.00102		1.04462	-10.8925	-10.3832
9	-0.000224475		1.21749	-9.06081	-8.84416
10	0.00165		1.39194	-6.92404	-7.23109
11	0.00143		1.56797	-5.24868	-5.7158
12	0.000166283		1.74557	-4.05022	-4.42594
13	0.0023		1.92476	-3.04766	-3.40471
14	0.00294		2.10553	-2.67246	-2.63012
15	0.00173		2.28788	-2.27055	-2.05349
16	0.00127		2.47181	-1.83136	-1.62522
17	0.000947962		2.65732	-1.60081	-1.30486
18	-0.000201703		2.84441	-1.56836	-1.06229
19	0.000478633		3.03307	-1.41736	-0.876011
20	0.00175		3.22332	-1.14481	-0.730838
21	0.0011		3.41515	-1.02594	-0.616061
22	0.0017
23	0.000309473
24	-0.0017
25	-0.00279
26	-0.00125
27	0.000640225
28	4.04132e-05
29	-0.000369903
30	5.94711e-05
31	-1.15528e-06
32	0.000598218
33	0.00115
34	0.000756966
35	-0.000583661
36	-0.00187
37	-0.000524913
38	0.000173276
39	0.000971215
40	0.00285
41	0.002
42	-0.00168
43	-0.0012
44	0.000310908
45	-0.000481153
46	0.000866718
47	0.000992497
48	-1.7248e-06
49	-0.00129
50	-0.00221
51	0.000955611
52	0.00118
53	0.000197168
54	0.000962947
55	-0.00114
56	-0.00183
57	-0.000186253
58	0.0012
59	0.00243
60	0.000312319
61	-0.00157
62	-0.00205
63	-0.00236
64	-0.0025
65	-0.00354
66	-0.00434
67	-0.00333
68	0.00236
69	0.00289
70	-0.00104
71	-0.00113
72	-0.00141
73	-0.00158
74	-0.00181
75	-0.00199
76	-0.000188753
77	-0.00119
78	-0.00191
79	-0.000341217
80	0.000254628
81	0.000260474
82	-0.00129
83	0.00067709
84	0.0013
85	-0.00116
86	0.000146425
87	-1.04634e-05
88	-0.00165
89	-0.00046424
90	-0.00172
91	-0.00202
92	0.000841638
93	0.000223074
94	0.000624509
95	0.000335945
96	-0.00064262
97	-0.000771184
98	0.000120252
99	0.00213
100	0.00184
101	0.000753561
102	0.00222
103	0.00231
104	-0.000263452
105	0.000587544
106	0.00378
107	0.00413
108	0.000910688
109	3.20142e-05
110	0.000303341
111	-1.53332e-05
112	0.000945993
113	0.000357319
114	-0.00189
115	-0.00152
116	-0.000428702
117	0.000332936
118	0.00301
119	0.00171
120	-0.00142
121	-0.0011
122	-0.00286
123	-0.00401
124	-0.00279
125	-0.00176
126	-0.000350654
127	-0.000818474
128	-0.00134
129	-0.00194
130	-0.00288
131	-0.000269753
132	0.000972427
133	0.000414607
134	-2.31896e-05
135	-0.00083076
136	-0.000688331
137	0.00148
138	0.00374
139	0.00127
140	-0.000488615
141	0.00142
142	0.00265
143	-0.000671297
144	-0.00249
145	-0.0018
146	-0.000363705
147	8.82584e-06
148	0.00202
149	0.00323
150	0.000166418
151	-0.000991052
152	-0.00192
153	-0.00293
154	-0.00254
155	-0.00129
156	0.000351393
157	0.00192
158	0.000896362
159	0.000198847
160	0.000271331
161	6.36773e-05
162	-0.00202
163	-0.00414
164	-0.00258
165	-0.00069716
166	0.00137
167	0.00161
168	-0.000770288
169	-0.000237998
170	0.000563984
171	-0.00242
172	-0.00179
173	0.000439848
174	-7.8197e-05
175	0.000253758
176	-0.000374288
177	-0.00295
178	-0.001
179	0.00181
180	0.000162755
181	-0.000845656
182	-0.00167
183	-0.00342
184	-0.00311
185	-0.000579299
186	-0.000117709
187	-0.000646099
188	-0.00126
189	-0.00225
190	-0.00171
191	-0.00152
192	-0.000997841
193	-0.000526189
194	2.54626e-05
195	0.000367114
196	0.0017
197	0.00223
198	0.000125051
199	-0.00109
200	-0.000239295
201	-0.000866469
202	-0.00267
203	-0.00114
204	0.0015
205	0.00118
206	0.000591966
207	0.00124
208	0.00126
209	0.000367846
210	0.000763139
211	0.00206
212	0.00228
213	0.000649019
214	-0.000962287
215	-0.000753413
216	-0.00116
217	-0.000725666
218	0.000783207
219	0.00234
220	0.00208
221	0.0012
222	0.00136
223	-0.000157446
224	0.000195734
225	0.00345
226	0.00279
227	0.00252
228	0.00269
229	0.000691634
230	-7.51857e-05
231	0.00177
232	0.000667104
233	-0.0029
234	-0.00329
235	-0.00195
236	-0.000252769
237	0.00115
238	-3.7705e-05
239	-0.000160173
240	-0.00116
241	-0.00258
242	-0.000556944
243	0.000954727
244	0.00153
245	0.00277
246	0.00328
247	0.001
248	-4.69161e-05
249	0.000607861
250	0.000183539
251	-0.000520782
252	-0.00101
253	-0.00237
254	-0.00408
255	-0.00277
256	0.00061761
257	0.000933289
258	-0.00192
259	-0.00233
260	0.000601797
261	0.00185
262	0.00258
263	-0.000919622
264	-0.00132
265	0.00133
266	0.00167
267	0.00265
268	0.00229
269	0.000570263
270	-0.00165
271	-0.003
272	-0.002
273	-0.00162
274	-0.00123
275	0.0014
276	0.00223
277	0.00269
278	0.0024
279	0.00125
280	0.00289
281	0.00548
282	0.00283
283	-0.00123
284	-0.00206
285	-0.00292
286	-0.00296
287	-0.00244
288	0.000676703
289	0.00366
290	0.00157
291	0.000929888
292	0.00036095
293	0.00155
294	0.00339
295	0.000512003
296	-0.000354131
297	0.000519735
298	0.0003336
299	-0.000402534
300	-0.00326
301	-0.00144
302	0.00177
303	-0.000533563
304	-0.00279
305	-0.00136
306	0.00109
307	0.000458875
308	-0.000495516
309	0.000760094
310	-0.000304113
311	-0.00159
312	0.000648788
313	-0.000194762
314	-0.00171
315	-0.00181
316	-0.00334
317	-0.00168
318	-0.000682509
319	-0.00324
320	-0.00295
321	-0.00176
322	-0.00229
323	-0.00297
324	-0.00108
325	0.00254
326	0.00376
327	0.00264
328	0.000756085
329	-0.00026635
330	0.000161215
331	0.00109
332	0.000716345
333	0.00073391
334	0.00111
335	0.000609039
336	-0.000493396
337	-0.00165
338	0.000553424
339	0.00105
340	-0.000869607
341	0.00104
342	0.000547362
343	0.00118
344	0.00302
345	0.000792851
346	-5.78821e-05
347	0.00152
348	0.00394
349	0.0055
350	0.00278
351	-0.000521546
352	-0.000782279
353	-0.00196
354	-0.00352
355	-0.00285
356	-0.00325
357	-0.00318
358	-0.00172
359	-0.000837393
360	0.00115
361	-0.000668853
362	-0.00216
363	-0.000670517
364	0.000248307
365	0.00334
366	0.0026
367	0.000374779
368	0.00126
369	-0.00214
370	-0.00126
371	0.00286
372	0.00403
373	0.00208
374	0.000434577
375	-0.00061734
376	-0.0022
377	-9.1172e-05
378	0.000776912
379	-0.00123
380	-0.0023
381	-0.00225
382	-0.00335
383	-0.00138
384	0.000480253
385	-0.000512997
386	0.00297
387	0.00388
388	0.00175
389	0.00236
390	8.92906e-06
391	-0.00352
392	-0.0048
393	-0.00196
394	0.00157
395	0.00121
396	0.000349255
397	-5.56912e-05
398	-0.00209
399	-0.000598149
400	0.00137
401	-0.000562047
402	-0.00338
403	-0.00276
404	-0.00114
405	-0.000699841
406	2.32098e-05
407	-0.00259
408	-0.00427
409	-0.00103
410	0.000638949
411	-0.000519854
412	0.000961343
413	0.000652541
414	-0.0013
415	0.00148
416	0.00227
417	0.0011
418	0.000185532
419	0.00267
420	0.00394
421	-0.000674211
422	-0.00358
423	-0.00649
424	-0.05941
425	-0.21196
426	-0.441
427	-0.67246
428	-0.81029
429	-0.81659
430	-0.71713
431	-0.57156
432	-0.43019
433	-0.31173
434	-0.22003
435	-0.15072
436	-0.10424
437	-0.07432
438	-0.05201
439	-0.04123
440	-0.0343
441	-0.02354
442	-0.01795
443	-0.01525
444	-0.01039
445	-0.0081
446	-0.00804
447	-0.00597
448	-0.00312
449	-0.00355
450	-0.00772
451	-0.01075
452	-0.01017
453	-0.00521
454	-0.00315
455	-0.00463
456	-0.00297
457	-0.00113
458	-0.00285
459	-0.00464
460	-0.00257
461	0.000359467
462	-0.000609087
463	-0.000517641
464	0.000723805
465	-0.00122
466	-0.0025
467	-0.00229
468	-0.00048041
469	0.000502433
470	-0.000764621
471	0.000898326
472	0.000661272
473	0.000294218
474	0.00375
475	0.00391
476	0.0015
477	0.000756263
478	0.0021
479	0.00217
480	0.00172
481	0.000935614
482	-0.000929548
483	-0.00075471
484	0.00332
485	0.00601
486	0.00367
487	0.00383
488	0.00204
489	-0.00221
490	-0.00338
491	-0.00165
492	0.0031
493	0.00233
494	-0.00027549
495	-0.000678066
496	-0.00361
497	-0.00398
498	-0.00235
499	-0.00218
500	-0.00309
501	-0.00347
502	-0.000552271
503	0.00295
504	0.00296
505	-0.000116752
506	0.000692134
507	0.00134
508	0.00107
509	0.00282
510	0.00121
511	0.000606564
512	0.00235
513	0.00401
514	0.0053
515	0.000783984
516	-0.00254
517	-0.00136
518	-0.0023
519	-0.00267
520	-0.00542
521	-0.00516
522	8.04452e-05
523	0.000829816
524	-0.00164
525	-0.00127
526	-2.07327e-06
527	-0.00162
528	-0.00196
529	-0.000853962
530	-0.000834654
531	-0.00238
532	0.000133754
533	0.00332
534	0.00178
535	0.000111367
536	-0.0015
537	-0.00129
538	0.00108
539	-0.00073169
540	-0.00264
541	0.000327152
542	0.0032
543	0.00675
544	0.00565
545	0.00138
546	-0.000285743
547	-0.00136
548	-0.00105
549	0.000812914
550	0.0018
551	0.000512198
552	0.000201839
553	-0.000868519
554	-0.00418
555	-0.00314
556	0.000920406
557	0.000899851
558	-0.000360704
559	0.00010874
560	-6.1816e-05
561	-0.00124
562	-0.00225
563	-0.0015
564	0.00221
565	0.00384
566	0.00227
567	-6.65151e-05
568	-0.00198
569	-0.00237
570	-0.000859285
571	-0.00176
572	-0.0033
573	-0.00257
574	-0.000883122
575	0.000115604
576	-0.000335671
577	0.000473055
578	0.00154
579	-0.000229494
580	-0.000420768
581	0.00376
582	0.00476
583	0.00231
584	0.000713999
585	0.000682641
586	0.000771283
587	0.00279
588	0.00387
589	0.000437208
590	-0.00105
591	0.000884492
592	-0.00141
593	-0.00234
594	-5.11328e-05
595	0.000466959
596	0.000715051
597	0.0018
598	0.00146
599	-0.00108
600	-0.00178
601	-0.00112
602	0.00221
603	0.00363
604	0.00185
605	-0.000458991
606	-0.00211
607	-0.00232
608	-0.00168
609	-0.00178
610	-0.00091815
611	-0.000543684
612	-0.00218
613	-0.000774753
614	-0.0013
615	-0.00258
616	-0.00236
617	-0.00246
618	-0.00476
619	-0.00502
620	-0.00227
621	-6.76588e-05
622	-0.01579
623	-0.11595
624	-0.3132
625	-0.56843
626	-0.83847
627	-1.06028
628	-1.16752
629	-1.13764
630	-0.99161
631	-0.78606
632	-0.59601
633	-0.43513
634	-0.30865
635	-0.21858
636	-0.15205
637	-0.10472
638	-0.07577
639	-0.05554
640	-0.0392
641	-0.03018
642	-0.02546
643	-0.02143
644	-0.01728
645	-0.01551
646	-0.01543
647	-0.01457
648	-0.01324
649	-0.00982
650	-0.00748
651	-0.00641
652	-0.00497
653	-0.00285
654	-0.000563497
655	-0.00082278
656	-0.00264
657	-0.00262
658	0.000509371
659	0.000380088
660	-0.00228
661	-0.00205
662	-0.000596774
663	-0.00138
664	-0.00209
665	-9.83091e-05
666	0.000364513
667	-0.000622666
668	0.000270156
669	0.00107
670	-0.00209
671	-0.00325
672	0.00174
673	0.00379
674	0.00302
675	0.00266
676	0.00211
677	0.000536049
678	0.00218
679	0.00221
680	-0.0011
681	-0.000422844
682	0.00118
683	0.00237
684	0.00381
685	0.00346
686	0.00144
687	0.0012
688	0.00182
689	0.000921235
690	0.000355627
691	-0.00028998
692	-0.00215
693	-0.00321
694	-0.00184
695	0.000567591
696	0.00133
697	0.000417711
698	-0.000983356
699	-0.00146
700	0.000254509
701	0.00243
702	0.00247
703	0.00158
704	0.000160241
705	0.00143
706	0.00352
707	0.0021
708	0.000437221
709	-0.000639347
710	0.000454085
711	0.000897517
712	-0.00132
713	-0.00346
714	-0.00374
715	-0.00042594
716	0.00286
717	0.0055
718	0.00269
719	-0.000776269
720	0.000251149
721	0.00289
722	0.0024
723	0.000433402
724	0.000873683
725	0.0016
726	0.00373
727	0.00414
728	0.00158
729	-0.00148
730	-0.00172
731	-0.00207
732	-0.00609
733	-0.00658
734	-0.00415
735	-0.00392
736	-0.00263
737	0.000269351
738	0.00169
739	0.000893763
740	-0.000844031
741	0.000588478
742	0.00392
743	0.00274
744	0.00252
745	0.00251
746	0.00148
747	-0.00157
748	-0.00325
749	0.00129
750	0.00171
751	4.00377e-05
752	0.00103
753	0.000436563
754	-0.000430174
755	0.00124
756	0.00194
757	0.000309614
758	-0.000927123
759	-0.00234
760	-0.00291
761	-0.00169
762	-0.00134
763	-0.00182
764	-0.00305
765	-0.00396
766	0.00145
767	0.00594
768	0.0021
769	-0.00203
770	-0.002
771	0.000995001
772	0.00199
773	0.00236
774	0.00394
775	0.0026
776	-0.000333384
777	-0.000345647
778	0.00040209
779	-0.000110173
780	0.00109
781	0.0005053
782	0.000463037
783	0.00244
784	0.000548511
785	-0.0029
786	-0.0021
787	-0.00168
788	-0.00108
789	0.00129
790	0.00236
791	0.00111
792	-0.000449221
793	-0.00206
794	-0.00427
795	-0.0041
796	-0.00162
797	0.000570326
798	-0.00111
799	-0.00203
800	-0.00194
801	-0.00282
802	-0.00338
803	-0.00357
804	-0.000311476
805	0.00207
806	0.0011
807	-0.000334045
808	0.000258431
809	-3.90917e-05
810	-0.00156
811	-0.00108
812	-0.00427
813	-0.00608
814	-0.000453469
815	0.00167
816	-0.00273
817	-0.0036
818	-4.60985e-05
819	0.000380744
820	7.67534e-05
821	0.000428997
822	-0.00863
823	-0.09285
824	-0.27264
825	-0.50763
826	-0.76721
827	-0.99178
828	-1.11065
829	-1.10403
830	-0.98799
831	-0.80345
832	-0.61474
833	-0.45308
834	-0.32581
835	-0.22928
836	-0.16342
837	-0.11824
838	-0.08432
839	-0.05873
840	-0.04084
841	-0.03303
842	-0.02988
843	-0.024
844	-0.01902
845	-0.01419
846	-0.00958
847	-0.01122
848	-0.01553
849	-0.01647
850	-0.01504
851	-0.01399
852	-0.00903
853	-0.00231
854	-0.00196
855	-0.00231
856	-1.11665e-05
857	6.72452e-05
858	-0.00279
859	-0.00574
860	-0.00276
861	-0.00156
862	-0.00393
863	-0.00427
864	-0.00376
865	-0.00127
866	0.000378919
867	0.000330029
868	-0.000268862
869	0.00106
870	0.00191
871	0.000974467
872	0.00271
873	0.00282
874	0.00175
875	0.00188
876	0.000104236
877	-9.04941e-05
878	0.00201
879	0.00453
880	0.00243
881	1.05843e-05
882	0.00241
883	0.00265
884	0.00164
885	0.0013
886	0.00116
887	0.00162
888	0.00135
889	0.000185215
890	0.00222
891	0.00262
892	-0.000340469
893	0.00165
894	0.00643
895	0.00493
896	0.00108
897	3.59388e-05
898	-0.0023
899	-0.00224
900	-0.000945643
901	0.000397975
902	0.00116
903	0.00131
904	0.00104
905	0.000552448
906	0.00229
907	0.00339
908	0.00271
909	0.000503935
910	0.000893194
911	0.00471
912	0.00214
913	-0.000449029
914	0.00118
915	0.00115
916	-2.12523e-05
917	-0.000470147
918	1.32153e-05
919	-0.00105
920	0.00074994
921	0.00242
922	-0.000903336
923	-0.00163
924	-0.00145
925	-0.00382
926	-0.00154
927	-0.000112725
928	-0.00277
929	-0.000871411
930	-0.00146
931	-0.00377
932	-0.0014
933	-0.000798784
934	-0.000113127
935	-0.000296473
936	-0.000619661
937	0.00362
938	0.00382
939	-0.000629224
940	-0.000592412
941	0.00243
942	0.00259
943	0.00112
944	0.000335022
945	0.000402007
946	0.000288992
947	0.000505978
948	0.00106
949	0.00297
950	0.00131
951	-0.00319
952	-0.00274
953	-0.000903784
954	-0.00103
955	-0.00111
956	-0.000696764
957	0.00030891
958	-2.54165e-05
959	0.000390257
960	0.00191
961	0.000470303
962	-0.000266727
963	-0.00193
964	-0.00136
965	-0.00157
966	-0.00403
967	-0.00274
968	-0.000478908
969	-0.00279
970	-0.00236
971	0.000863801
972	0.00125
973	0.0024
974	0.000301689
975	-0.000929016
976	-0.00162
977	-0.000440424
978	0.00211
979	-0.000595544
980	-0.000440401
981	0.00224
982	0.00538
983	0.00467
984	-0.00101
985	-0.00212
986	0.000900456
987	0.000755103
988	-0.00199
989	-0.000684516
990	-0.00101
991	-0.00192
992	-0.000623946
993	-0.000553756
994	-0.00131
995	-0.00232
996	-0.00231
997	-0.00274
998	-0.00151
999	0.00251
1000	0.00522
1001	0.00268
1002	-0.00196
1003	-0.00337
1004	-0.00191
1005	-0.00117
1006	-0.00203
1007	-0.00221
1008	-0.000952658
1009	-0.00262
1010	-0.00355
1011	-0.00167
1012	-0.00147
1013	-0.000190602
1014	-0.00017629
1015	0.000236418
1016	-7.08739e-05
1017	-0.00385
1018	-0.00314
1019	0.00013725
1020	0.00102
1021	0.00139
1022	-0.00202
1023	-0.0515
1024	-0.18547
1025	-0.39149
1026	-0.62785
1027	-0.8467
1028	-0.99404
1029	-1.03976
1030	-0.97598
1031	-0.82736
1032	-0.6579
1033	-0.49998
1034	-0.36986
1035	-0.27026
1036	-0.19654
1037	-0.14096
1038	-0.09842
1039	-0.0737
1040	-0.05805
1041	-0.04566
1042	-0.03671
1043	-0.02842
1044	-0.02483
1045	-0.02328
1046	-0.02172
1047	-0.01943
1048	-0.01404
1049	-0.01317
1050	-0.01597
1051	-0.01315
1052	-0.0073
1053	-0.00353
1054	-0.00477
1055	-0.00692
1056	-0.00596
1057	-0.00541
1058	-0.00476
1059	-0.00497
1060	-0.00406
1061	8.89534e-06
1062	0.00167
1063	0.00174
1064	0.00154
1065	0.000864307
1066	0.00208
1067	0.00237
1068	0.00323
1069	0.00417
1070	0.00471
1071	0.00411
1072	-0.000154225
1073	-0.00293
1074	-0.00319
1075	-0.00251
1076	-0.00131
1077	-0.000924496
1078	0.000535626
1079	0.00311
1080	0.00389
1081	0.00301
1082	0.00212
1083	0.00013624
1084	-0.00147
1085	-0.00146
1086	0.000519
1087	0.0011
1088	0.000869709
1089	0.00261
1090	0.00106
1091	-0.000234228
1092	0.00113
1093	0.00127
1094	0.000881952
1095	0.00042373
1096	9.55077e-05
1097	-2.71443e-06
1098	0.000789063
1099	0.00214
1100	0.00157
1101	-0.000965603
1102	0.00112
1103	0.0038
1104	0.00215
1105	-0.000291567
1106	0.000847331
1107	0.00208
1108	0.00225
1109	0.00226
1110	0.00117
1111	0.00131
1112	0.00161
1113	0.00307
1114	-0.00037321
1115	-0.00286
1116	-0.000871233
1117	0.00166
1118	0.00577
1119	0.00523
1120	0.00128
1121	-0.00063764
1122	-0.000325429
1123	-2.32181e-05
1124	-0.00383
1125	-0.00278
1126	0.00228
1127	0.00263
1128	0.00441
1129	0.00344
1130	0.00121
1131	-8.94087e-05
1132	-0.00212
1133	-0.00198
1134	-0.00118
1135	0.000668402
1136	0.00219
1137	0.00345
1138	0.00199
1139	-0.00346
1140	-0.00338
1141	-0.00103
1142	0.00166
1143	0.00288
1144	-0.00158
1145	-0.00203
1146	0.000163072
1147	-0.000566237
1148	-0.0012
1149	-0.000324856
1150	0.00241
1151	0.00466
1152	0.00369
1153	0.00256
1154	0.00197
1155	0.000368027
1156	-0.00238
1157	-0.00476
1158	-0.00349
1159	-0.00121
1160	-0.00214
1161	-0.00142
1162	-0.000395801
1163	-0.00263
1164	-0.00154
1165	0.000835078
1166	-0.000348831
1167	-0.00085274
1168	9.33507e-05
1169	-0.000720558
1170	-0.000934467
1171	-0.00103
1172	-0.0049
1173	-0.00581
1174	-0.00178
1175	0.00176
1176	0.00327
1177	0.000902448
1178	-0.000606197
1179	-0.00219
1180	-0.00164
1181	-0.000505584
1182	-0.00176
1183	-0.00235
1184	-0.00121
1185	0.00203
1186	-0.000405887
1187	-0.00452
1188	-0.0034
1189	0.000841931
1190	0.00409
1191	0.00495
1192	0.00246
1193	-7.58043e-05
1194	0.00102
1195	-0.000905109
1196	-0.00293
1197	-0.0014
1198	-0.000404352
1199	-0.000999751
1200	-0.00259
1201	-0.00269
1202	0.000664053
1203	0.000608655
1204	-0.00271
1205	-0.000792143
1206	0.000612459
1207	5.63523e-06
1208	0.000404677
1209	-0.000386282
1210	-0.00197
1211	-0.00389
1212	-0.00576
1213	-0.00429
1214	-0.0016
1215	-0.000682034
1216	0.000834862
1217	0.00175
1218	0.003
1219	0.00212
1220	-0.000707528
1221	-0.00197
1222	-0.00348
1223	-0.04614
1224	-0.16294
1225	-0.34193
1226	-0.55542
1227	-0.74976
1228	-0.8806
1229	-0.92714
1230	-0.88276
1231	-0.76549
1232	-0.6218
1233	-0.48452
1234	-0.36849
1235	-0.27784
1236	-0.20638
1237	-0.15158
1238	-0.11058
1239	-0.08422
1240	-0.07034
1241	-0.0601
1242	-0.04975
1243	-0.03967
1244	-0.03242
1245	-0.03044
1246	-0.02926
1247	-0.02285
1248	-0.01631
1249	-0.01352
1250	-0.01257
1251	-0.01437
1252	-0.01566
1253	-0.01166
1254	-0.0063
1255	-0.00484
1256	-0.00393
1257	-0.0042
1258	-0.00419
1259	-0.00562
1260	-0.0086
1261	-0.00658
1262	-0.00397
1263	-0.00294
1264	-0.00105
1265	0.000951193
1266	0.000951164
1267	0.00253
1268	0.000961107
1269	-0.000556984
1270	-0.0013
1271	-0.00365
1272	0.000551232
1273	0.00258
1274	0.00165
1275	0.00211
1276	0.0021
1277	-0.000115074
1278	0.000401277
1279	0.00288
1280	0.00333
1281	0.00213
1282	0.00144
1283	0.000934898
1284	-0.000788378
1285	0.000408347
1286	0.00195
1287	0.00196
1288	0.00113
1289	0.000771436
1290	0.000763362
1291	0.00206
1292	0.00261
1293	0.00118
1294	0.00222
1295	0.00471
1296	0.00117
1297	-0.000708674
1298	-8.05036e-05
1299	-0.000802333
1300	0.000395838
1301	0.00176
1302	0.00335
1303	0.00403
1304	0.00342
1305	0.00312
1306	0.000461458
1307	-0.000283798
1308	0.00277
1309	0.00471
1310	0.00172
1311	-0.000844823
1312	-0.000280079
1313	-0.000481068
1314	0.000319512
1315	0.000680091
1316	0.00168
1317	0.00157
1318	0.00054183
1319	-0.00040759
1320	0.000202989
1321	0.00141
1322	-0.00115
1323	-0.00294
1324	0.00115
1325	0.00218
1326	-0.00076143
1327	0.000483626
1328	0.00263
1329	0.000683739
1330	-0.00015079
1331	0.00201
1332	0.000995093
1333	0.000153035
1334	-6.90229e-05
1335	-0.00244
1336	-0.00127
1337	-0.000995197
1338	-0.00271
1339	-0.00252
1340	-0.00283
1341	-0.00172
1342	-0.000551474
1343	0.00131
1344	0.00147
1345	0.00144
1346	0.00146
1347	-0.000745775
1348	5.33606e-05
1349	-0.00217
1350	-0.00485
1351	-0.0029
1352	0.00106
1353	0.00252
1354	0.000308151
1355	-0.000382717
1356	0.00153
1357	0.00378
1358	0.00323
1359	0.00404
1360	0.00216
1361	-0.00417
1362	-0.00436
1363	-0.00125
1364	0.00344
1365	0.00316
1366	0.000865609
1367	0.000201366
1368	-0.00222
1369	-0.000497118
1370	0.00102
1371	0.00144
1372	0.00323
1373	0.00244
1374	0.000130962
1375	-0.00192
1376	-0.00169
1377	-0.000773929
1378	-0.000812226
1379	-0.000460523
1380	-0.00219
1381	-0.00314
1382	-0.00263
1383	-0.00119
1384	0.000110157
1385	0.000316188
1386	-0.00345
1387	-0.00462
1388	-0.00279
1389	-0.000359691
1390	0.000516339
1391	-0.00246
1392	-0.000725363
1393	0.00132
1394	0.000263889
1395	-0.000456485
1396	-0.00268
1397	-0.00352
1398	-0.00139
1399	0.00145
1400	0.00336
1401	0.00262
1402	0.00259
1403	0.00347
1404	0.00286
1405	-0.000821527
1406	-0.00366
1407	-0.00395
1408	-0.00373
1409	-0.0039
1410	-0.00378
1411	-0.00522
1412	-0.00408
1413	-0.000353377
1414	-0.000686937
1415	-0.0021
1416	-0.000714055
1417	0.000872386
1418	0.00199
1419	5.83702e-05
1420	-0.00312
1421	-0.00105
1422	0.000140537
1423	-0.03066
1424	-0.11967
1425	-0.2654
1426	-0.44119
1427	-0.60577
1428	-0.71971
1429	-0.76456
1430	-0.74229
1431	-0.66487
1432	-0.55976
1433	-0.4484
1434	-0.35031
1435	-0.27565
1436	-0.2157
1437	-0.16497
1438	-0.13092
1439	-0.10872
1440	-0.08717
1441	-0.07113
1442	-0.05954
1443	-0.04871
1444	-0.04385
1445	-0.04365
1446	-0.03965
1447	-0.03394
1448	-0.03078
1449	-0.02944
1450	-0.02556
1451	-0.01853
1452	-0.0139
1453	-0.01117
1454	-0.01055
1455	-0.00886
1456	-0.00821
1457	-0.01148
1458	-0.01161
1459	-0.00895
1460	-0.00683
1461	-0.00358
1462	-0.00206
1463	-0.0021
1464	-0.00253
1465	-0.00394
1466	-0.00525
1467	-0.00273
1468	0.00208
1469	0.000253233
1470	-0.00136
1471	7.43701e-05
1472	-0.00177
1473	-0.00292
1474	-0.00266
1475	-0.00226
1476	-0.00369
1477	-0.00142
1478	0.00348
1479	0.00356
1480	0.00292
1481	0.00252
1482	0.00218
1483	0.000911034
1484	5.41915e-05
1485	0.000607349
1486	0.000640507
1487	0.00113
1488	0.000396822
1489	-0.00185
1490	-0.00101
1491	0.00165
1492	0.00211
1493	0.00134
1494	0.00105
1495	0.00313
1496	0.00348
1497	0.00311
1498	0.00185
1499	-0.00070317
1500	-0.00341
1501	-0.00138
1502	0.00319
1503	0.00142
1504	0.000882443
1505	0.0029
1506	0.00432
1507	0.0053
1508	0.0041
1509	0.00128
1510	-0.000351182
1511	-0.000476179
1512	-0.000381176
1513	0.000343827
1514	0.00075883
1515	-0.00164
1516	-0.00507
1517	-0.00131
1518	0.00342
1519	0.000746452
1520	-0.000261259
1521	0.00195
1522	-0.00041668
1523	-0.0012
1524	-0.000167654
1525	0.000171162
1526	0.0048
1527	0.00582
1528	0.00314
1529	0.0016
1530	-0.000494755
1531	-0.00159
1532	-0.000197122
1533	0.000246361
1534	2.04347e-05
1535	-0.00157
1536	0.000718582
1537	0.00569
1538	0.00587
1539	0.00443
1540	0.00265
1541	0.0013
1542	-0.00174
1543	-0.00169
1544	-0.000498946
1545	-0.000141679
1546	0.00182
1547	0.000632856
1548	-0.000799876
1549	-0.00428
1550	-0.00297
1551	0.000842608
1552	0.00111
1553	0.00161
1554	0.000275983
1555	-0.00258
1556	-0.00465
1557	-0.0019
1558	-0.00261
1559	-0.00564
1560	-0.00322
1561	-0.0036
1562	-0.00397
1563	-0.00174
1564	-0.00231
1565	-0.00261
1566	0.000586958
1567	0.00563
1568	0.00627
1569	0.004
1570	0.00223
1571	-5.22617e-05
1572	-0.00124
1573	-0.00159
1574	0.00164
1575	0.00301
1576	0.00355
1577	0.00155
1578	-0.00253
1579	-0.00135
1580	-0.0013
1581	-0.00099648
1582	-0.000526861
1583	-0.00327
1584	-0.00349
1585	-0.00227
1586	-0.00114
1587	0.000670072
1588	0.00112
1589	-0.000651198
1590	-0.00491
1591	-0.00406
1592	-0.00193
1593	-0.00278
1594	-0.000631288
1595	-0.0015
1596	-0.00426
1597	0.000124463
1598	0.000873047
1599	-0.000728369
1600	-9.97855e-05
1601	0.000338798
1602	0.00249
1603	0.00125
1604	0.000426147
1605	0.00135
1606	0.00363
1607	0.00231
1608	-0.000931378
1609	-0.00022826
1610	0.00108
1611	0.00196
1612	0.00101
1613	-0.000785251
1614	-0.00242
1615	-0.00259
1616	-0.00435
1617	-0.00571
1618	-0.00528
1619	-0.00259
1620	-0.0016
1621	-0.00361
1622	-0.00212
1623	-0.01618
1624	-0.07624
1625	-0.18071
1626	-0.31282
1627	-0.44692
1628	-0.54165
1629	-0.58393
1630	-0.58062
1631	-0.53351
1632	-0.45881
1633	-0.37963
1634	-0.30525
1635	-0.24324
1636	-0.19454
1637	-0.15675
1638	-0.12689
1639	-0.10469
1640	-0.09066
1641	-0.07904
1642	-0.06823
1643	-0.05794
1644	-0.05388
1645	-0.05079
1646	-0.04489
1647	-0.03964
1648	-0.03407
1649	-0.03371
1650	-0.03181
1651	-0.02636
1652	-0.02664
1653	-0.0212
1654	-0.01591
1655	-0.01713
1656	-0.01654
1657	-0.01513
1658	-0.01131
1659	-0.00757
1660	-0.00895
1661	-0.00914
1662	-0.00521
1663	-0.0041
1664	-0.00479
1665	-0.00421
1666	-0.00274
1667	-0.00414
1668	-0.00546
1669	-0.000866539
1670	0.00253
1671	0.000346731
1672	0.000983365
1673	0.00289
1674	0.00089999
1675	-0.00146
1676	0.00083891
1677	0.00133
1678	-0.00062217
1679	0.00019729
1680	0.00076675
1681	-0.00078379
1682	-0.00138
1683	-0.000159056
1684	-0.000195424
1685	-0.00202
1686	-0.00178
1687	0.00275
1688	0.00336
1689	0.00258
1690	0.00332
1691	0.00162
1692	0.000992259
1693	0.00119
1694	-0.000319687
1695	-9.06606e-05
1696	0.00183
1697	0.00304
1698	0.00388
1699	0.0023
1700	0.000309172
1701	0.00123
1702	0.00216
1703	0.00187
1704	0.00293
1705	0.00339
1706	0.00148
1707	0.00021315
1708	0.000448069
1709	0.000838125
1710	-0.0016
1711	-0.00308
1712	-0.00126
1713	0.00129
1714	0.00215
1715	-0.00132
1716	-0.00284
1717	-0.00263
1718	-0.00117
1719	-0.00070191
1720	-0.000117617
1721	0.00177
1722	0.00209
1723	0.000145262
1724	-0.00248
1725	-0.00112
1726	-0.000100334
1727	-0.000482452
1728	-0.00052457
1729	-0.000396688
1730	0.000821194
1731	0.0027
1732	0.00208
1733	0.00119
1734	0.000582722
1735	-0.00116
1736	-0.000746662
1737	-0.00245
1738	-0.00254
1739	0.000575907
1740	-3.3236e-05
1741	-2.37948e-06
1742	0.00222
1743	0.00217
1744	0.00256
1745	0.0041
1746	-0.000201648
1747	-0.000978519
1748	-0.00083539
1749	-0.00207
1750	0.000930868
1751	0.00198
1752	-0.000292819
1753	-0.00022844
1754	0.00111
1755	7.0316e-05
1756	0.00109
1757	0.00223
1758	0.00349
1759	0.00443
1760	0.0031
1761	0.000506516
1762	0.000230616
1763	0.0012
1764	-0.00113
1765	-0.00402
1766	-0.00264
1767	-0.0025
1768	-0.00108
1769	0.00372
1770	0.00216
1771	-0.00244
1772	-0.00329
1773	-0.00206
1774	0.000799899
1775	0.00245
1776	-0.000286352
1777	-0.00295
1778	0.000667397
1779	0.00175
1780	-0.00375
1781	-0.00442
1782	-0.00325
1783	-0.00188
1784	-0.00116
1785	-0.00316
1786	-0.00597
1787	-0.00528
1788	-0.000304788
1789	0.00288
1790	0.00318
1791	0.00383
1792	0.000809049
1793	-0.00415
1794	-0.0049
1795	-0.00167
1796	0.00229
1797	0.00115
1798	-0.00164
1799	-0.00169
1800	-0.000631654
1801	-0.00429
1802	-0.00401
1803	0.00186
1804	0.00133
1805	0.000321982
1806	0.00158
1807	0.000411965
1808	-0.000893044
1809	0.000151948
1810	0.00156
1811	0.00138
1812	0.00178
1813	0.00169
1814	0.000335281
1815	-0.00091306
1816	0.00105
1817	0.000600259
1818	-0.00345
1819	-0.00262
1820	-0.000644763
1821	-0.000873104
1822	-0.00153
1823	-0.00937
1824	-0.04848
1825	-0.12447
1826	-0.22218
1827	-0.31743
1828	-0.39042
1829	-0.43028
1830	-0.43119
1831	-0.40101
1832	-0.34694
1833	-0.28855
1834	-0.23931
1835	-0.19665
1836	-0.15774
1837	-0.1289
1838	-0.11006
1839	-0.09291
1840	-0.07653
1841	-0.063
1842	-0.05864
1843	-0.05555
1844	-0.05109
1845	-0.04561
1846	-0.03953
1847	-0.03437
1848	-0.02959
1849	-0.02982
1850	-0.02903
1851	-0.02449
1852	-0.02061
1853	-0.01764
1854	-0.01709
1855	-0.01575
1856	-0.01215
1857	-0.01225
1858	-0.01263
1859	-0.01074
1860	-0.00851
1861	-0.00621
1862	-0.00357
1863	-0.0041
1864	-0.00586
1865	-0.00157
1866	0.00124
1867	-0.00281
1868	-0.00312
1869	-0.000427386
1870	-0.00192
1871	-0.00543
1872	-0.00706
1873	-0.00545
1874	-0.00183
1875	0.00264
1876	0.00519
1877	0.000853726
1878	-0.00285
1879	-0.000534082
1880	-7.79852e-05
1881	0.000718111
1882	0.00166
1883	0.000720304
1884	-0.000793332
1885	-0.00134
1886	-0.00144
1887	-0.00118
1888	0.00258
1889	0.00407
1890	0.00413
1891	0.00332
1892	0.00187
1893	0.00117
1894	0.000610658
1895	0.00178
1896	0.000802017
1897	0.00116
1898	0.00227
1899	0.00158
1900	0.00445
1901	0.00484
1902	0.00051792
1903	0.000231918
1904	0.000665916
1905	0.000589914
1906	0.000463913
1907	0.000447911
1908	0.00207
1909	0.00252
1910	0.00342
1911	0.00081679
1912	-0.00181
1913	0.000372422
1914	-0.000199761
1915	-0.000191945
1916	0.00418
1917	0.00258
1918	-0.00385
1919	-0.00395
1920	-0.000509127
1921	-1.74272e-05
1922	1.42725e-05
1923	0.00173
1924	0.00206
1925	0.00146
1926	-0.000668929
1927	0.000692771
1928	0.00215
1929	-0.00079935
1930	0.00108
1931	0.000321715
1932	-0.00118
1933	0.001
1934	0.000498313
1935	0.00204
1936	0.00443
1937	0.00361
1938	-0.000174924
1939	0.000633978
1940	0.00407
1941	-3.82179e-05
1942	0.000350684
1943	0.00272
1944	-1.15117e-05
1945	0.00046739
1946	0.00245
1947	0.00137
1948	-0.00242
1949	-0.00221
1950	0.00114
1951	0.00143
1952	-0.000946585
1953	-0.0002556
1954	0.00148
1955	-0.00142
1956	-0.000541998
1957	0.00141
1958	0.000330695
1959	-0.000187959
1960	0.000273388
1961	0.0011
1962	-0.000813919
1963	-0.00525
1964	-0.00707
1965	-0.0035
1966	-0.000472353
1967	-0.000892283
1968	-0.00217
1969	-0.00223
1970	-0.000282072
1971	0.00185
1972	0.00139
1973	0.0015
1974	0.00255
1975	0.000571516
1976	-0.000710527
1977	-0.00081257
1978	0.00263
1979	0.00327
1980	1.30087e-06
1981	-0.000841914
1982	-0.00184
1983	-0.000291771
1984	0.000913301
1985	-0.000381627
1986	-0.00121
1987	-0.00186
1988	-0.00152
1989	-0.00178
1990	-0.00312
1991	-0.00355
1992	-0.00466
1993	-0.00445
1994	0.000107158
1995	0.00318
1996	0.00266
1997	-0.000178592
1998	-0.00362
1999	-0.00277
[truncated: 2,224 more rows]

## Sheet: Figure S3A
Ni-4
Concentration of Co2+ (nM)	F/F0	Stdev
50	0.889938	0.0122413
100	0.821869	0.0082013
250	0.742418	0.0130751
500	0.692559	0.0050068
750	0.647003	0.00857545
1000	0.604392	0.011217
2000	0.532072	0.0104929
5000	0.439319	0.0145671
10000	0.371368	0.00218349

## Sheet: Figure S3B
Ni-4
Concentration of Ni2+ (nM)	F/F0	Stdev
50	0.908947	0.00179616
100	0.815918	0.0196113
250	0.681327	0.0196253
500	0.556106	0.0247525
750	0.501882	0.0163193
1000	0.467299	0.00174026
2000	0.401681	0.00291574

[truncated: 14 more sheets: Figure S4A， S4B, Figure S6A， Mn2+, Figure S6B， Fe2+, Figure S6B， Ni2+, Figure S6B， Cu2+, Figure S6B， Zn2+, Figure S6B， Cd2+, Figure S7A， Mn2+, Figure S7A， Fe2+, Figure S7A， Ni2+, Figure S7A， Cu2+, Figure S7A， Cu2+ (2), Figure S7A， Cd2+, Figure S8]
